# Supplementary material for: OutbreakFinder: a visualization tool for rapid detection of bacterial strain clusters based on optimized multidimensional scaling
Source: PeerJ journal article supplement (doi:10.7717/peerj.7600), 2019-08-28
Supplement: AppendixA.pdf [file AppendixA.pdf]

**Appendix A.** The MDS method derivation.

Given  $n$  points  $\{X_1, X_2 \dots X_n\}$  in  $w$ -dimensional space, where

$$X_i = \begin{bmatrix} x_{i1} \\ x_{i2} \\ \vdots \\ x_{iw} \end{bmatrix}$$

And the Euclidean distance between node  $X_i$  and  $X_j$  should be

$$d_{ij}^2 = \sum_{k=1}^w (X_{ik} - X_{jk})^2 = \|X_i - X_j\|^2 = (X_i - X_j)^T (X_i - X_j)$$

Let  $M$  be an inner product matrix and  $m_{ij} = X_i^T X_j$ , where  $m_{ij}$  is an inner product of  $X_i$  and  $X_j$ .  $M$  is a symmetric matrix, therefore  $X_i^T X_j = X_j^T X_i$ . The matrix  $M$  is shown below:

$$M = \begin{bmatrix} m_{11} & \cdots & m_{1n} \\ \vdots & \ddots & \vdots \\ m_{n1} & \cdots & m_{nn} \end{bmatrix}$$

Assuming centered configuration to excluding the effect of coordinate translation:

$$\sum_{k=1}^n X_k = 0$$

Expanding the formula for Euclidean distance:

$$\begin{aligned} d_{ij}^2 &= X_i^T X_i + X_j^T X_j - 2X_i^T X_j \\ \frac{1}{n} \sum_{i=1}^n d_{ij}^2 &= \frac{1}{n} \sum_{i=1}^n (X_i^T X_i + X_j^T X_j - 2X_i^T X_j) \\ &= \frac{1}{n} \left( \sum_{i=1}^n X_i^T X_i + nX_j^T X_j - 2 \left( \sum_{i=1}^n X_i \right)^T X_j \right) \end{aligned}$$

Then, the formula (1) and (2) are derived:

$$\frac{1}{n} \sum_{i=1}^n d_{ij}^2 = \frac{1}{n} \sum_{i=1}^n X_i^T X_i + X_j^T X_j \quad (1)$$

$$\frac{1}{n} \sum_{j=1}^n d_{ij}^2 = X_i^T X_i + \frac{1}{n} \sum_{j=1}^n X_j^T X_j \quad (2)$$

Expanding the formula of Euclidean distance for all  $d_{ij}$ :

$$\begin{aligned} \frac{1}{n^2} \sum_{i=1}^n \sum_{j=1}^n d_{ij}^2 &= \frac{1}{n^2} \sum_{i=1}^n \sum_{j=1}^n (X_i^T X_i + X_j^T X_j - 2X_i^T X_j) \\ &= \frac{1}{n^2} \left( n \sum_{i=1}^n X_i^T X_i + n \sum_{j=1}^n X_j^T X_j - 2 \sum_{j=1}^n \left( \sum_{i=1}^n X_i \right)^T X_j \right) \end{aligned}$$

Then, the formula (3) is derived:

$$\frac{1}{n^2} \sum_{i=1}^n \sum_{j=1}^n d_{ij}^2 = \frac{2}{n} \sum_{i=1}^n X_i^T X_i \quad (3)$$

Solve the following equations by using formula (1)+(2)-(3)

$$X_i^T X_i + X_j^T X_j = \frac{1}{n} \sum_{i=1}^n d_{ij}^2 + \frac{1}{n} \sum_{j=1}^n d_{ij}^2 - \frac{1}{n^2} \sum_{i=1}^n \sum_{j=1}^n d_{ij}^2 \quad (4)$$

Bring  $d_{ij}^2$  into formula (4):

$$\begin{aligned} m_{ij} &= X_i^T X_j \\ &= -\frac{1}{2} (d_{ij}^2 - X_i^T X_i - X_j^T X_j) \\ &= -\frac{1}{2} \left( d_{ij}^2 - \frac{1}{n} \sum_{i=1}^n d_{ij}^2 - \frac{1}{n} \sum_{j=1}^n d_{ij}^2 + \frac{1}{n^2} \sum_{i=1}^n \sum_{j=1}^n d_{ij}^2 \right) \end{aligned}$$

Above formula can be translate into simple form, let  $b_{ij} = -\frac{1}{2} d_{ij}^2$ , and then we can denote  $b_{i\_}$ ,  $b_{\_j}$  and  $b_{\_}$  as following:

$$b_{i\_} = \frac{1}{n} \sum_{j=1}^n b_{ij}$$

$$b_{\_j} = \frac{1}{n} \sum_{i=1}^n b_{ij}$$

$$b_{-} = \frac{1}{n^2} \sum_{j=1}^n \sum_{i=0}^n b_{ij}$$

Therefore, we got following formulas:

$$m_{ij} = b_{ij} - b_{i_{-}} - b_{j_{-}} + b_{-}$$

$$M = \begin{bmatrix} b_{11} - b_{1_{-}} - b_{1_{-}} + b_{-} & \cdots & b_{1n} - b_{1_{-}} - b_{n_{-}} + b_{-} \\ \vdots & \ddots & \vdots \\ b_{n1} - b_{n_{-}} - b_{1_{-}} + b_{-} & \cdots & b_{nn} - b_{n_{-}} - b_{n_{-}} + b_{-} \end{bmatrix}$$

M is a symmetric matrix, which can be translate into following form:

$$M = UAU$$

Substituting  $U = I - \frac{1}{n}E$  directly into  $M = UAU$ :

$$M = \left(I - \frac{1}{n}E\right)A\left(I - \frac{1}{n}E\right) = A - \frac{1}{n}EA - \frac{1}{n}AE - \frac{1}{n^2}EAE$$

In metric MDS problem, the matrix M can be reconstructed based on the following spectral decomposition and Cholesky decomposition:

$$M = VCV^T = V\sqrt{C}\sqrt{C}V^T = (\sqrt{C}V^T)^T(\sqrt{C}V^T)$$

Where V is eigenvectors and C is diagonal matrix of eigenvalue. M is an inner product matrix, which can be represented as following form:

$$M = \begin{bmatrix} x_1^T \\ x_2^T \\ \vdots \\ x_n^T \end{bmatrix} [x_1 \quad x_2 \quad \cdots \quad x_n] = XX^T$$

Therefore, we got new coordinates of all points X by following equation:

$$X = V\sqrt{C}$$
