# Supplementary material for: OutbreakFinder: a visualization tool for rapid detection of bacterial strain clusters based on optimized multidimensional scaling
Source: PeerJ journal article supplement (doi:10.7717/peerj.7600), 2019-08-28
Supplement: FigureS1.pdf [file FigureS1.pdf]

(A) Traditional MDS

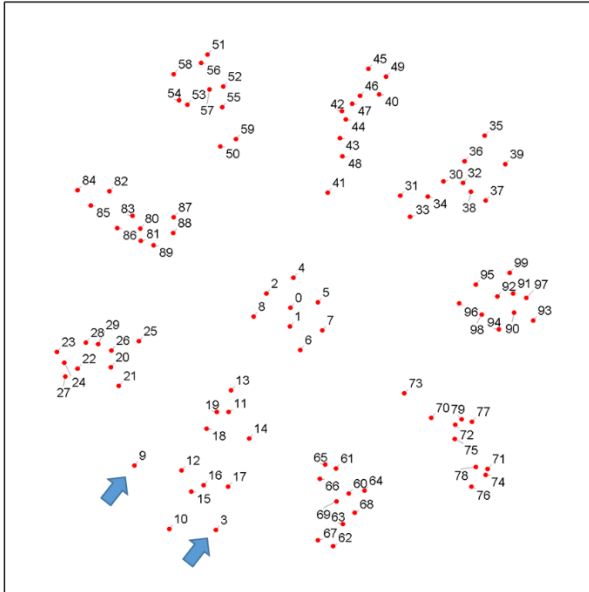

(B) MDS Using Newton's method

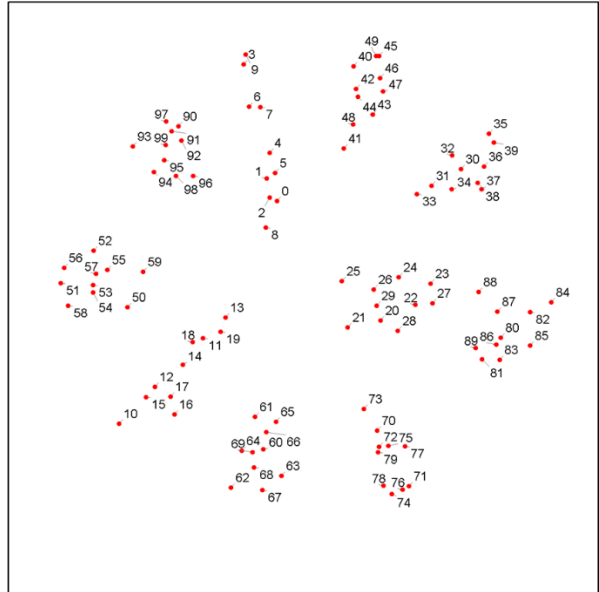

**Figure S1.** Comparison for MDS with the traditional MDS (A) and Newton's method (B). The 100 points are generated by the function `genSimulationData()` as shown in Supplementary Appendix B. (A) The traditional MDS is generated by Scikit-learn, which is a machine learning library for Python, as shown in Supplementary Appendix C. It can be found that the points 9 and 3 are assigned to the wrong group. (B) The MDS by using Newton's method (NMDS) can reduce the grouping errors.
