# Supplementary material for: OutbreakFinder: a visualization tool for rapid detection of bacterial strain clusters based on optimized multidimensional scaling
Source: PeerJ journal article supplement (doi:10.7717/peerj.7600), 2019-08-28
Supplement: FigureS2.pdf [file FigureS2.pdf]

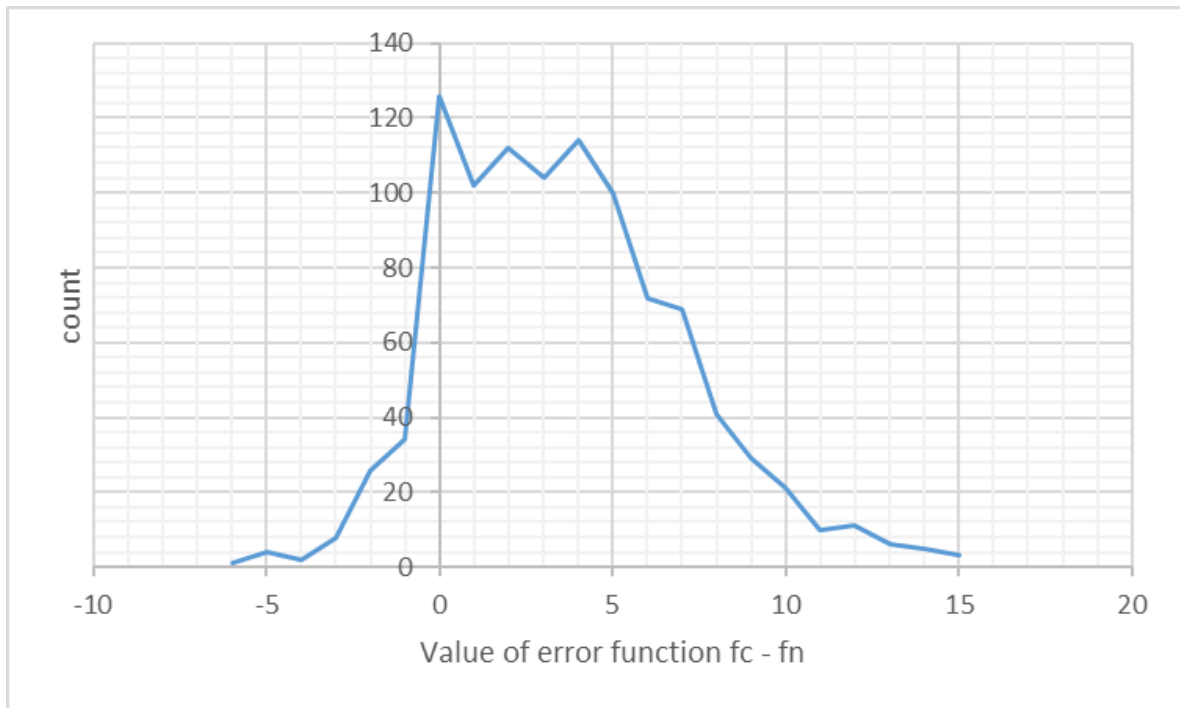

**Figure S2.** The distribution of  $fc - fn$  simulated 1000 times, where the error functions  $fc$  and  $fn$  represent the MDS of the traditional and Newtonian methods, respectively.
